# Supplementary material for: A Multicenter Study to Assess EGFR Mutational Status in Plasma: Focus on an Optimized Workflow for Liquid Biopsy in a Clinical Setting
Source: PubMed Central journal article supplement (PMC6162772; doi:10.3390/cancers10090290), 2018-08-27
Supplement: cancers-10-00290-s001.pdf [file cancers-10-00290-s001.pdf]

# Supplementary Materials: A Multicenter Study to Assess EGFR Mutational Status in Plasma: Focus on an Optimized Workflow for Liquid Biopsy in a Clinical Setting

Laure Sorber, Karen Zwaenepoel, Koen De Winne, Kaat Van Casteren, Elien Augustus, Julie Jacobs, Xiang Hua Zhang, Daniëlla Galdermans, Els De Droogh, Anneke Lefebure, Ann-Marie Morel, Erika Saenen, Frédérique Bustin, Ingel Demedts, Ulrike Himpe, Thierry Pieters, Paul Germonpré, Sofie Derijcke, Koen Deschepper, Jan P. Van Meerbeeck, Christian Rolfo, Patrick Pauwels

*Multiplex assays: primer and probe sequences, and concentration*

## EGFR Multiplex 1

### Exon 19 deletion hotspot

- Forward primer: 5'-GTGAGAAAGTTAAAATTCCCGTC-3' – 1.875  $\mu$ M
- Reverse primer: 5'-CACACAGCAAAGCAGAAAC-3' – 1.875  $\mu$ M
- Probe deletion hotspot: 5'-FAM-AGGAATTAAGAGAAGCAACATC-MGB-NFQ-3' – 1  $\mu$ M
- Probe reference region: 5'-VIC-ATCGAGGATTCCTTGTTG-MGB-NFQ-3' – 1  $\mu$ M

### Exon 20: T790M mutation

- Forward primer: 5'-GCCTGCTGGGCATCTG-3' – 0.94  $\mu$ M
- Reverse primer: 5'-AGCAGGTACTGGGAGCCAATA-3' – 0.94  $\mu$ M
- Probe: 5'-FAM-ATGAGCTGCATGATGAG-MGB-NFQ-3' – 0.5  $\mu$ M

## EGFR Multiplex 2

### Exon 19: G719A/C/S mutations

- Forward primer: 5'-CCTTATACACCGTGCCGAAC-3' – 1.875  $\mu$ M
- Reverse primer: 5'-CCTTATACACCGTGCCGAAC-3' – 1.875  $\mu$ M
- Probe mutations: 5'-FAM-AGCCCAGCACTTTGATCTTT-MBG-NFQ-3' – 1  $\mu$ M
- Probe WT: 5'-VIC-CCTCAAGAGAGCTTGTTGG-MGB-NFQ-3' – 1  $\mu$ M

### Exon 21: L858R mutation

- Forward primer: 5'-GCAGCATGTCAAGATCACAGATT-3' – 2.85  $\mu$ M
- Reverse primer: 5'-CCTCCTTCTGCATGGTATTCTTTCT-3' – 2.85  $\mu$ M
- Probe mutation: 5'-FAM-AGTTTGGCCCGCCCAA-MGB-NFQ-3' – 1.75  $\mu$ M

### Exon 21: L861Q mutation

- Forward and reverse primer from exon 21 L858R mutation
- Probe mutation: 5'-FAM-CTGGCCAAACAGCTGGGT-MGB-NFQ-3' – 0.75  $\mu$ M

*Digital Droplet PCR (ddPCR)*

Both ddPCR multiplex assays were assembled by 10.5  $\mu$ L 2x ddPCR Supermix for Probes (BioRad), 2  $\mu$ L primer/probe mix, and 8.5  $\mu$ L of isolated sample. Assays could be run on the same PCR plate, as they had identical thermal cycling conditions: 95°C for 10 minutes, 40 cycles of 95°C for 30 seconds, then 62°C for 1 minute, followed by 98°C for 10 minutes and cooling to 4°C.

**Table S1:** Data overview.

| Patient | Sample No | EGFR status | Sens | Tube | CP | Transit Time | Hemolysis | #mL | Average Temp | EGFR mut ctDNA |
|---------|-----------|-------------|------|------|----|--------------|-----------|-----|--------------|----------------|
| 1       | 1         | 0           | 1    | 0    | 0  | 1            | 0         | 0.5 | 16.0         | na             |
| 2       | 1         | 0           | 0    | 0    | 0  | 6            | 1         | 0.5 | 16.0         | na             |
| 3       | 1         | 0           | 2    | 0    | 0  | 2            | 0         | 3.0 | 4.7          | na             |
| 4       | 1         | 0           | 2    | 0    | 0  | 0            | 0         | 2.0 | 17.5         | na             |
| 5       | 1         | 0           | 1    | 0    | 1  |              | 0         | 3.0 | 13.3         | na             |
| 6       | 1         | 0           | 2    | 0    | 1  | 5            | 1         | 3.0 | 15.0         | na             |
| 7       | 1         | 0           | 2    | 0    | 0  | 1            | 0         | 2.0 | 16.0         | na             |
| 8       | 1         | 0           | 1    | 0    | 1  | 3            | 0         | 4.0 | 13.3         | na             |
| 9       | 1         | 0           | 2    | 0    | 0  | 1            | 0         | 3.0 | 4.7          | na             |
| 10      | 1         | 0           | 1    | 0    | 1  | 4            | 0         | 3.0 | 15.0         | na             |
| 11      | 1         | 0           | 1    | 0    | 1  | 2            | 0         | 3.5 | 6.6          | na             |
| 12      | 1         | 0           | 2    | 0    | 0  | 0            | 0         | 4.0 | 20.0         | na             |
| 13      | 1         | 0           | 2    | 0    | 0  | 0            | 0         | 3.5 | 20.0         | na             |
| 14      | 1         | 0           | 1    | 0    | 0  | 0            | 0         | 2.5 | 8.5          | na             |
| 15      | 1         | 0           | 2    | 0    | 0  | 1            | 0         | 3.0 | 6.1          | na             |
| 16      | 1         | 0           | 2    | 0    | 0  | 1            | 0         | 4.0 | 6.1          | na             |
| 17      | 1         | 0           | 2    | 0    | 0  | 0            | 0         | 4.0 | 15.5         | na             |
| 18      | 1         | 0           | 2    | 0    | 0  | 0            | 0         | 4.0 | 15.5         | na             |
| 19      | 1         | 0           | 2    | 0    | 1  | 3            | 0         | 3.0 | 18.1         | na             |
| 20      | 1         | 0           | 2    | 0    | 1  | 1            | 0         | 4.0 | 4.7          | na             |
| 20      | 2         | 0           | 1    | 0    | 0  | 3            | 0         | 1.5 | 9.6          | na             |
| 21      | 1         | 0           | 0    | 0    | 0  | 10           | 0         | 1.5 | 1.1          | na             |
| 22      | 1         | 0           | 2    | 0    | 0  | 1            | 0         | 4.0 | 1.1          | na             |
| 23      | 1         | 0           | 1    | 0    | 0  | 4            | 1         | 1.0 | 14.2         | na             |
| 24      | 1         | 0           | 2    | 0    | 0  | 1            | 0         | 2.0 | 14.2         | na             |
| 25      | 1         | 0           | 1    | 0    | 0  | 1            | 0         | 2.0 | 1.1          | na             |
| 26      | 1         | 0           | 1    | 0    | 0  | 1            | 0         | 1.5 | 8.5          | na             |
| 27      | 1         | 0           | 0    | 0    | 0  | 3            | 0         | 0.5 | 8.5          | na             |
| 28      | 1         | 0           | 1    | 0    | 0  | 0            | 0         | 4.0 | 18.1         | na             |
| 29      | 1         | 0           | 2    | 0    | 0  | 3            | 1         | 2.0 | 9.7          | na             |
| 30      | 1         | 0           | 2    | 0    | 0  | 0            | 0         | 4.0 | 6.1          | na             |
| 31      | 1         | 0           | 2    | 0    | 0  | 1            | 1         | 4.0 | 1.1          | na             |
| 32      | 1         | 0           | 2    | 0    | 0  | 3            | 0         | 4.5 | 1.1          | na             |
| 33      | 1         | 0           | 2    | 0    | 0  | 0            | 0         | 3.5 | 18.3         | na             |
| 34      | 1         | 0           | 1    | 0    | 1  | 0            | 1         | 3.0 | 13.3         | na             |
| 35      | 1         | 0           | 0    | 0    | 0  | 5            | 1         | 1.0 | 9.7          | na             |

|    |   |   |   |   |   |   |   |     |      |    |
|----|---|---|---|---|---|---|---|-----|------|----|
| 36 | 1 | 0 | 0 | 0 | 0 |   | 0 | 0.5 | 9.7  | na |
| 37 | 1 | 0 | 1 | 0 | 0 | 0 | 0 | 4.0 | 14.2 | na |
| 38 | 1 | 0 | 2 | 0 | 0 | 4 | 0 | 2.0 | 9.7  | na |
| 39 | 1 | 0 | 0 | 0 | 0 | 8 | 1 | 0.5 | 6.1  | na |
| 40 | 1 | 0 | 1 | 0 | 0 | 0 | 1 | 1.5 | 9.6  | na |
| 41 | 1 | 0 | 2 | 0 | 0 | 1 | 0 | 3.0 | 14.2 | na |
| 42 | 1 | 0 | 2 | 0 | 0 | 0 | 0 | 3.5 | 9.6  | na |
| 43 | 1 | 0 | 1 | 0 | 0 | 1 | 1 | 1.0 | 14.2 | na |
| 44 | 1 | 0 | 2 | 0 | 0 | 0 | 0 | 1.0 | 16.0 | na |
| 45 | 1 | 0 | 1 | 0 | 0 | 0 | 1 | 1.0 | 16.0 | na |
| 46 | 1 | 0 | 2 | 0 | 0 | 0 | 0 | 3.5 | 16.0 | na |
| 47 | 1 | 0 | 2 | 0 | 0 | 2 | 1 | 1.5 | 16.0 | na |
| 48 | 1 | 0 | 0 | 0 | 0 | 0 | 1 | 2.0 | 5.3  | na |
| 49 | 1 | 0 | 1 | 0 | 0 | 0 | 0 | 4.0 | 6.1  | na |
| 50 | 1 | 0 | 1 | 0 | 0 | 1 | 0 | 1.0 | 5.3  | na |
| 51 | 1 | 0 | 0 | 0 | 0 | 0 | 0 | 2.0 | 18.1 | na |
| 52 | 1 | 0 | 2 | 0 | 0 | 1 | 0 | 3.5 | 8.5  | na |
| 53 | 1 | 0 | 0 | 0 | 0 | 2 | 1 | 1.0 | 18.3 | na |
| 54 | 1 | 0 | 2 | 0 | 0 | 1 | 0 | 2.5 | 16.0 | na |
| 55 | 1 | 0 | 1 | 0 | 0 | 0 | 1 | 3.0 | 16.0 | na |
| 56 | 1 | 0 | 1 | 0 | 0 | 7 | 1 | 2.0 | 6.1  | na |
| 57 | 1 | 0 | 1 | 0 | 1 | 1 | 0 | 4.0 | 19.2 | na |
| 58 | 1 | 0 | 2 | 0 | 0 | 1 | 0 | 4.0 | 17.5 | na |
| 59 | 1 | 0 | 0 | 0 | 0 | 4 | 0 | 1.0 | 6.1  | na |
| 60 | 1 | 0 | 2 | 0 | 0 | 1 | 0 | 2.0 | 6.1  | na |
| 61 | 1 | 0 | 1 | 0 | 0 | 2 | 1 | 1.0 | 6.1  | na |
| 62 | 1 | 0 | 2 | 0 | 0 | 1 | 0 | 4.0 | 4.7  | na |
| 63 | 1 | 0 | 2 | 0 | 0 | 1 | 0 | 3.0 | 4.7  | na |
| 64 | 1 | 0 | 0 | 0 | 0 | 1 | 1 | 0.5 | 4.7  | na |
| 65 | 1 | 0 | 2 | 0 | 0 | 1 | 1 | 4.0 | 4.7  | na |
| 66 | 1 | 0 | 2 | 0 | 0 | 1 | 0 | 4.0 | 4.7  | na |
| 67 | 1 | 0 | 2 | 0 | 0 | 1 | 0 | 4.0 | 4.7  | na |
| 68 | 1 | 0 | 2 | 0 | 0 | 1 | 0 | 3.0 | 1.1  | na |
| 69 | 1 | 0 | 2 | 0 | 0 | 1 | 0 | 3.5 | 17.5 | na |
| 70 | 1 | 0 | 1 | 0 | 0 | 1 | 1 | 4.0 | 1.1  | na |
| 71 | 1 | 0 | 2 | 0 | 0 | 1 | 0 | 3.5 | 1.1  | na |
| 72 | 1 | 0 | 2 | 0 | 0 | 1 | 0 | 2.0 | 6.1  | na |
| 73 | 1 | 0 | 2 | 0 | 0 | 1 | 0 | 2.5 | 6.1  | na |
| 74 | 1 | 0 | 1 | 0 | 0 | 1 | 1 | 3.0 | 6.1  | na |
| 75 | 1 | 0 | 1 | 0 | 0 | 1 | 1 | 4.0 | 6.1  | na |
| 76 | 1 | 0 | 2 | 0 | 0 | 1 | 0 | 4.0 | 9.6  | na |
| 77 | 1 | 0 | 2 | 0 | 0 | 1 | 0 | 4.0 | 9.6  | na |
| 78 | 1 | 0 | 2 | 0 | 0 | 1 | 0 | 4.0 | 8.8  | na |
| 79 | 1 | 0 | 1 | 0 | 0 | 1 | 0 | 4.0 | 8.8  | na |
| 80 | 1 | 0 | 2 | 0 | 0 | 1 | 0 | 4.0 | 9.7  | na |
| 81 | 1 | 0 | 2 | 0 | 0 | 1 | 0 | 4.0 | 15.5 | na |
| 82 | 1 | 0 | 2 | 0 | 0 | 2 | 0 | 4.0 | 15.5 | na |

---

|     |   |   |   |   |   |   |   |     |      |    |
|-----|---|---|---|---|---|---|---|-----|------|----|
| 83  | 1 | 0 | 2 | 0 | 0 | 1 | 0 | 3.0 | 15.5 | na |
| 84  | 1 | 0 | 2 | 0 | 0 | 1 | 0 | 4.0 | 15.5 | na |
| 85  | 1 | 0 | 2 | 0 | 0 | 6 | 1 | 3.5 | 15.5 | na |
| 86  | 1 | 0 | 1 | 0 | 1 | 0 | 0 | 4.0 | 19.2 | na |
| 87  | 1 | 0 | 1 | 0 | 1 | 1 | 0 | 4.0 | 18.6 | na |
| 88  | 1 | 0 | 2 | 0 | 1 | 1 | 0 | 4.0 | 18.6 | na |
| 89  | 1 | 0 | 1 | 0 | 1 | 1 | 1 | 4.0 | 18.1 | na |
| 90  | 1 | 0 | 2 | 0 | 1 | 1 | 0 | 4.0 | 18.1 | na |
| 91  | 1 | 0 | 2 | 0 | 0 | 1 | 0 | 4.0 | 9.7  | na |
| 92  | 1 | 0 | 2 | 0 | 1 | 1 | 0 | 4.0 | 18.1 | na |
| 93  | 1 | 0 | 1 | 0 | 0 | 1 | 0 | 1.0 | 9.7  | na |
| 94  | 1 | 0 | 1 | 0 | 0 | 1 | 0 | 1.0 | 9.7  | na |
| 95  | 1 | 0 | 0 | 0 | 0 | 5 | 0 | 1.0 | 6.1  | na |
| 96  | 1 | 0 | 2 | 0 | 0 | 4 | 0 | 1.5 | 6.1  | na |
| 97  | 1 | 0 | 2 | 0 | 0 | 0 | 0 | 3.5 | 20.0 | na |
| 98  | 1 | 0 | 2 | 0 | 0 | 0 | 0 | 4.0 | 20.0 | na |
| 98  | 2 | 0 | 2 | 0 | 0 | 0 | 0 | 4.0 | 20.0 | na |
| 99  | 1 | 0 | 1 | 0 | 0 | 0 | 0 | 4.0 | 20.0 | na |
| 100 | 1 | 0 | 2 | 0 | 0 | 0 | 0 | 4.0 | 20.0 | na |
| 101 | 1 | 0 | 2 | 0 | 0 | 0 | 0 | 4.0 | 16.0 | na |
| 102 | 1 | 0 | 1 | 0 | 0 | 3 | 0 | 3.5 | 16.0 | na |
| 103 | 1 | 0 | 2 | 0 | 0 | 1 | 0 | 3.0 | 18.3 | na |
| 103 | 2 | 0 | 2 | 0 | 0 | 2 | 0 | 3.0 | 17.5 | na |
| 104 | 1 | 0 | 1 | 0 | 0 | 0 | 0 | 3.0 | 16.0 | na |
| 104 | 2 | 0 | 2 | 0 | 0 | 0 | 0 | 4.0 | 17.5 | na |
| 105 | 1 | 0 | 2 | 0 | 0 | 0 | 1 | 4.0 | 18.3 | na |
| 105 | 2 | 0 | 2 | 0 | 0 | 0 | 0 | 4.0 | 17.5 | na |
| 105 | 3 | 0 | 0 | 0 | 0 | 2 | 1 | 3.0 | 1.1  | na |
| 106 | 1 | 0 | 1 | 0 | 0 | 0 | 0 | 4.0 | 18.1 | na |
| 107 | 1 | 0 | 1 | 0 | 0 | 1 | 0 | 2.0 | 17.5 | na |
| 108 | 1 | 0 | 1 | 0 | 0 | 0 | 0 | 3.0 | 8.5  | na |
| 109 | 1 | 0 | 2 | 0 | 1 | 6 | 0 | 4.0 | 18.1 | na |
| 110 | 1 | 0 | 1 | 0 | 0 | 0 | 0 | 4.0 | 8.5  | na |
| 111 | 1 | 0 | 2 | 0 | 0 | 2 | 1 |     | 14.2 | na |
| 112 | 1 | 0 | 2 | 0 | 0 | 1 | 0 | 2.0 | 14.2 | na |
| 113 | 1 | 0 | 2 | 0 | 0 | 0 | 0 | 3.0 | 16.0 | na |
| 114 | 1 | 0 | 1 | 0 | 0 | 3 | 0 | 2.0 | 18.3 | na |
| 115 | 1 | 0 | 2 | 0 | 0 | 4 | 0 | 1.0 | 18.1 | na |
| 116 | 1 | 0 | 0 | 0 | 0 | 0 | 0 | 3.5 | 1.1  | na |
| 117 | 1 | 0 | 0 | 0 | 0 | 0 | 0 | 4.0 | 1.1  | na |
| 118 | 1 | 0 | 2 | 0 | 0 | 0 | 0 | 3.0 | 1.1  | na |
| 119 | 1 | 0 | 1 | 0 | 0 | 2 | 0 | 2.0 | 4.7  | na |
| 120 | 1 | 0 | 2 | 0 | 0 | 3 | 1 | 2.5 | 18.3 | na |
| 121 | 1 | 0 | 2 | 0 | 0 | 0 | 1 | 4.0 | 9.7  | na |
| 122 | 1 | 0 | 1 | 0 | 0 | 2 | 1 | 1.0 | 1.1  | na |
| 123 | 1 | 0 | 2 | 0 | 0 | 1 | 0 | 2.0 | 9.7  | na |
| 123 | 2 | 0 | 1 | 0 | 0 | 0 | 0 | 3.0 | 1.1  | na |

---

|     |   |   |   |   |    |    |   |     |      |    |
|-----|---|---|---|---|----|----|---|-----|------|----|
| 123 | 3 | 0 | 2 | 0 | 0  |    | 1 | 3.0 | 8.8  | na |
| 123 | 4 | 0 | 1 | 0 | 1  | 0  | 0 | 3.5 | 18.6 | na |
| 124 | 1 | 0 | 2 | 0 | 0  | 0  | 0 | 3.0 | 4.7  | na |
| 125 | 1 | 1 | 1 | 0 | 1  | 0  | 0 | 3.0 | 18.1 | 0  |
| 125 | 2 | 1 | 1 | 0 | 1  | 0  | 1 | 4.0 | 18.1 | 0  |
| 125 | 3 | 1 | 1 | 0 | 1  | 0  | 0 | 4.0 | 15.0 | 0  |
| 125 | 4 | 1 | 2 | 0 | 1  | 1  | 0 | 3.0 | 15.0 | 1  |
| 126 | 1 | 1 | 2 | 0 | 0  | 1  | 1 | 2.0 | 18.3 | 0  |
| 127 | 1 | 1 | 1 | 0 | 1  | 1  | 0 | 3.0 | 18.1 | 0  |
| 128 | 1 | 1 | 2 | 0 | 0  | 3  | 0 |     | 5.3  | 1  |
| 129 | 1 | 1 | 1 | 0 | 0  | 1  | 0 | 1.0 | 16.0 | 0  |
| 129 | 2 | 1 | 2 | 0 | 0  | 1  | 0 | 3.0 | 4.7  | 0  |
| 130 | 1 | 1 | 2 | 0 | 0  | 2  | 0 | 1.5 | 17.5 | 0  |
| 131 | 1 | 1 | 2 | 1 | na | na | 0 | 1.5 | na   | 0  |
| 131 | 2 | 1 | 1 | 0 | 0  | 3  | 0 | 1.0 | 4.5  | 0  |
| 131 | 3 | 1 | 1 | 0 | 0  | 2  | 0 | 2.0 | 5.3  | 0  |
| 131 | 4 | 1 | 2 | 0 | 0  | 1  | 0 | 2.5 | 8.5  | 0  |
| 131 | 5 | 1 | 1 | 0 | 0  | 2  | 0 | 1.0 | 17.5 | 0  |
| 131 | 6 | 1 | 2 | 0 | 0  | 1  | 0 | 3.0 | 1.1  | 0  |
| 131 | 7 | 1 | 1 | 0 | 0  | 1  | 0 | 4.0 | 8.8  | 0  |
| 131 | 8 | 1 | 1 | 0 | 1  | 2  | 0 | 4.0 | 13.3 | 1  |
| 131 | 9 | 1 | 2 | 0 | 1  | 1  | 0 | 4.0 | 3.3  | 1  |
| 132 | 1 | 1 | 1 | 0 | 0  | 2  | 0 | 1.0 | 5.3  | 0  |
| 132 | 2 | 1 | 2 | 0 | 0  | 2  | 0 | 1.0 | 16.0 | 0  |
| 132 | 3 | 1 | 2 | 0 | 0  | 2  | 0 | 1.5 | 17.5 | 0  |
| 132 | 4 | 1 | 2 | 0 | 0  | 1  | 0 | 3.0 | 9.6  | 0  |
| 132 | 5 | 1 | 1 | 0 | 1  | 1  | 0 | 4.0 | 19.2 | 0  |
| 132 | 6 | 1 | 1 | 0 | 1  | 1  | 0 | 3.5 | 13.3 | 0  |
| 133 | 1 | 1 | 2 | 0 | 0  | 1  | 0 | 4.0 | 16.0 | 0  |
| 134 | 1 | 1 | 1 | 0 | 0  | 1  | 0 | 4.0 | 15.5 | 0  |
| 134 | 2 | 1 | 1 | 0 | 0  | 1  | 0 | 4.0 | 15.5 | 0  |
| 134 | 3 | 1 | 2 | 0 | 1  | 1  | 0 | 4.0 | 19.2 | 0  |
| 134 | 4 | 1 | 2 | 0 | 1  | 1  | 0 | 4.0 | 18.6 | 0  |
| 134 | 5 | 1 | 2 | 0 | 1  | 1  | 0 | 4.0 | 13.3 | 0  |
| 134 | 6 | 1 | 1 | 0 | 1  | 4  | 0 | 4.0 | 3.3  | 0  |
| 135 | 1 | 1 | 1 | 0 | 1  | 1  | 0 | 4.0 | 15.0 | 0  |
| 135 | 2 | 1 | 1 | 0 | 1  | 1  | 0 | 4.0 | 6.6  | 0  |
| 136 | 1 | 1 | 1 | 0 | 1  | 2  | 0 | 4.0 | 4.4  | 0  |
| 137 | 1 | 1 | 2 | 0 | 1  | 1  | 0 | 4.0 | 4.4  | 1  |
| 138 | 1 | 1 | 0 | 1 | na | na | 0 | 2.0 | na   | 0  |
| 138 | 2 | 1 | 1 | 0 | 0  | 5  | 1 | 0.5 | 4.5  | 0  |
| 138 | 3 | 1 | 1 | 0 | 0  | 4  | 0 | 0.5 | 5.3  | 0  |
| 138 | 4 | 1 | 2 | 0 | 0  | 6  | 0 | 0.5 | 5.3  | 0  |
| 139 | 1 | 1 | 2 | 1 | na | na | 0 | 4.0 | na   | 1  |
| 139 | 2 | 1 | 0 | 0 | 0  | 7  | 1 | 0.5 | 4.5  | 0  |
| 139 | 3 | 1 | 2 | 0 | 0  | 1  | 0 | 2.0 | 5.3  | 0  |
| 139 | 4 | 1 | 2 | 0 | 0  | 1  | 0 | 3.5 | 18.3 | 0  |

|     |    |   |   |   |    |    |   |     |      |   |
|-----|----|---|---|---|----|----|---|-----|------|---|
| 139 | 5  | 1 | 1 | 0 | 0  | 1  | 1 | 2.0 | 17.5 | 0 |
| 139 | 6  | 1 | 2 | 0 | 0  | 1  | 1 | 3.0 | 17.5 | 0 |
| 139 | 7  | 1 | 0 | 0 | 0  | 2  | 0 | 0.5 | 6.1  | 0 |
| 139 | 8  | 1 | 2 | 0 | 0  | 1  | 1 | 2.0 | 4.7  | 0 |
| 139 | 9  | 1 | 0 | 0 | 0  | 4  | 0 | 3.0 | 4.7  | 0 |
| 139 | 10 | 1 | 2 | 0 | 0  | 1  | 0 | 4.0 | 6.1  | 1 |
| 140 | 1  | 1 | 2 | 1 | na | na | 0 | 1.5 | na   | 0 |
| 140 | 2  | 1 | 2 | 1 | na | na | 0 | 4.0 | na   | 0 |
| 140 | 3  | 1 | 0 | 0 | 0  | 3  | 1 | 1.0 | 4.8  | 0 |
| 140 | 4  | 1 | 1 | 0 | 0  | 2  | 0 | 1.0 | 5.3  | 0 |
| 140 | 5  | 1 | 0 | 0 | 0  | 1  | 0 | 1.0 | 8.5  | 0 |
| 140 | 6  | 1 | 1 | 0 | 0  | 1  | 0 | 1.5 | 14.2 | 1 |
| 140 | 7  | 1 | 2 | 0 | 0  | 1  | 0 | 1.0 | 16.0 | 1 |
| 140 | 8  | 1 | 1 | 0 | 0  | 2  | 1 | 1.0 | 18.3 | 1 |
| 140 | 9  | 1 | 1 | 0 | 0  | 1  | 0 | 1.5 | 18.1 | 1 |
| 140 | 10 | 1 | 0 | 0 | 0  | 1  | 0 | 1.0 | 18.1 | 0 |
| 140 | 11 | 1 | 2 | 0 | 0  | 1  | 0 | 2.0 | 17.5 | 0 |
| 140 | 12 | 1 | 1 | 0 | 0  | 4  | 0 | 1.0 | 17.5 | 0 |
| 140 | 13 | 1 | 0 | 0 | 0  | 1  | 0 | 1.0 | 9.7  | 0 |
| 140 | 14 | 1 | 1 | 0 | 0  | 2  | 1 | 0.5 | 6.1  | 0 |
| 140 | 15 | 1 | 2 | 0 | 0  | 1  | 0 | 2.0 | 1.1  | 0 |
| 140 | 16 | 1 | 1 | 0 | 0  | 1  | 0 | 3.5 | 6.1  | 0 |
| 140 | 17 | 1 | 2 | 0 | 0  | 1  | 0 | 4.0 | 8.8  | 1 |
| 141 | 1  | 1 | 2 | 1 | na | na | 0 | 2.5 | na   | 0 |
| 141 | 2  | 1 | 2 | 0 | 0  | 0  | 0 | 2.5 | 4.8  | 0 |
| 141 | 3  | 1 | 0 | 0 | 0  | 5  | 0 | 0.5 | 4.5  | 0 |
| 141 | 4  | 1 | 1 | 0 | 0  | 2  | 0 | 2.0 | 4.5  | 0 |
| 142 | 1  | 1 | 1 | 0 | 0  | 2  | 0 | 2.5 | 4.8  | 0 |
| 142 | 2  | 1 | 1 | 0 | 0  | 1  | 0 | 3.5 | 8.5  | 0 |
| 142 | 3  | 1 | 2 | 0 | 0  | 2  | 0 | 3.0 | 17.5 | 0 |
| 142 | 4  | 1 | 2 | 0 | 0  | 1  | 0 | 3.5 | 9.6  | 0 |
| 142 | 5  | 1 | 1 | 0 | 1  | 1  | 0 | 4.0 | 15.0 | 0 |
| 143 | 1  | 1 | 1 | 0 | 0  | 2  | 0 | 2.0 | 14.2 | 0 |
| 143 | 2  | 1 | 1 | 0 | 0  | 1  | 0 | 3.0 | 16.0 | 0 |
| 143 | 3  | 1 | 1 | 0 | 0  | 3  | 0 | 2.0 | 18.1 | 0 |
| 143 | 4  | 1 | 2 | 0 | 0  | 1  | 0 | 3.5 | 9.6  | 1 |
| 143 | 5  | 1 | 1 | 0 | 1  | 1  | 0 | 4.0 | 18.6 | 0 |
| 144 | 1  | 1 | 2 | 0 | 0  | 1  | 0 | 1.5 | 8.5  | 0 |
| 144 | 2  | 1 | 2 | 0 | 0  | 1  | 0 | 1.5 | 14.2 | 1 |
| 144 | 3  | 1 | 1 | 0 | 0  | 1  | 0 | 2.0 | 18.3 | 1 |
| 144 | 4  | 1 | 2 | 0 | 0  | 1  | 0 | 1.5 | 17.5 | 1 |
| 144 | 5  | 1 | 2 | 0 | 0  | 1  | 0 | 1.0 | 9.7  | 1 |
| 144 | 6  | 1 | 2 | 0 | 0  | 1  | 0 | 2.0 | 4.7  | 1 |
| 144 | 7  | 1 | 0 | 0 | 0  | 4  | 1 | 0.8 | 1.1  | 1 |
| 144 | 8  | 1 | 2 | 0 | 0  | 1  | 1 | 1.0 | 1.1  | 1 |
| 144 | 9  | 1 | 2 | 0 | 0  | 1  | 0 | 3.0 | 6.1  | 1 |
| 144 | 10 | 1 | 2 | 0 | 0  | 1  | 0 | 4.0 | 8.8  | 1 |

|     |    |   |   |   |    |    |   |     |      |   |
|-----|----|---|---|---|----|----|---|-----|------|---|
| 144 | 11 | 1 | 2 | 0 | 0  | 1  | 0 | 4.0 | 15.5 | 1 |
| 144 | 12 | 1 | 2 | 0 | 0  | 1  | 0 | 4.0 | 19.2 | 1 |
| 145 | 1  | 1 | 1 | 0 | 0  | 3  | 1 | 2.0 | 4.8  | 0 |
| 145 | 2  | 1 | 2 | 0 | 0  | 5  | 0 | 1.5 | 4.5  | 0 |
| 145 | 3  | 1 | 2 | 0 | 0  | 2  | 0 | 2.0 | 4.5  | 0 |
| 145 | 4  | 1 | 2 | 0 | 0  | 2  | 0 | 1.5 | 4.5  | 0 |
| 145 | 5  | 1 | 2 | 0 | 0  | 2  | 0 | 2.0 | 5.3  | 0 |
| 145 | 6  | 1 | 2 | 0 | 0  | 1  | 0 | 2.0 | 8.5  | 0 |
| 145 | 7  | 1 | 2 | 0 | 0  | 1  | 0 | 2.5 | 8.5  | 0 |
| 145 | 8  | 1 | 2 | 0 | 0  | 1  | 0 | 2.0 | 14.2 | 0 |
| 145 | 9  | 1 | 2 | 0 | 0  | 1  | 0 | 2.0 | 16.0 | 0 |
| 145 | 10 | 1 | 1 | 0 | 0  | 1  | 0 | 1.0 | 18.3 | 0 |
| 145 | 11 | 1 | 2 | 0 | 0  | 1  | 0 | 2.0 | 18.1 | 0 |
| 145 | 12 | 1 | 2 | 0 | 0  | 1  | 1 | 2.0 | 9.7  | 0 |
| 145 | 13 | 1 | 2 | 0 | 0  | 1  | 1 | 2.0 | 6.1  | 0 |
| 145 | 14 | 1 | 0 | 0 | 0  | 2  | 1 | 2.0 | 1.1  | 0 |
| 145 | 15 | 1 | 2 | 0 | 0  | 1  | 1 | 3.0 | 6.1  | 0 |
| 145 | 16 | 1 | 1 | 0 | 0  | 7  | 1 | 4.0 | 9.6  | 0 |
| 145 | 17 | 1 | 2 | 0 | 0  | 1  | 0 | 4.0 | 15.5 | 0 |
| 145 | 18 | 1 | 2 | 0 | 1  | 1  | 0 | 4.0 | 19.2 | 0 |
| 145 | 19 | 1 | 1 | 0 | 1  | 1  | 1 | 4.0 | 18.1 | 0 |
| 145 | 20 | 1 | 1 | 0 | 1  | 1  | 0 | 4.0 | 15.0 | 0 |
| 145 | 21 | 1 | 1 | 0 | 1  | 1  | 0 | 4.0 | 13.3 | 0 |
| 145 | 22 | 1 | 2 | 0 | 1  | 1  | 0 | 4.0 | 4.4  | 0 |
| 146 | 1  | 1 | 1 | 1 | na | na | 0 | 1.5 | na   | 0 |
| 146 | 2  | 1 | 2 | 0 | 0  | 1  | 0 | 2.0 | 5.3  | 1 |
| 147 | 1  | 1 | 1 | 0 | 0  | 1  | 0 | 4.0 | 18.3 | 0 |
| 148 | 1  | 1 | 2 | 0 | 0  | 2  | 0 | 3.0 | 6.1  | 1 |
| 148 | 2  | 1 | 2 | 0 | 0  | 2  | 0 | 4.0 | 6.1  | 1 |
| 148 | 3  | 1 | 2 | 0 | 0  | 2  | 0 | 3.0 | 4.7  | 1 |
| 148 | 4  | 1 | 2 | 0 | 0  | 1  | 0 | 4.0 | 1.1  | 1 |
| 149 | 1  | 1 | 2 | 0 | 0  | 3  | 0 | 2.5 | 4.7  | 1 |
| 149 | 2  | 1 | 2 | 0 | 0  | 2  | 0 | 2.0 | 1.1  | 1 |
| 149 | 3  | 1 | 2 | 0 | 0  | 1  | 0 | 4.0 | 6.1  | 1 |
| 150 | 1  | 1 | 2 | 0 | 0  | 1  | 1 | 1.5 | 1.1  | 0 |
| 151 | 1  | 1 | 1 | 0 | 0  | 1  | 0 | 3.5 | 9.6  | 0 |
| 152 | 1  | 1 | 1 | 0 | 0  | 2  | 0 | 2.5 | 15.5 | 1 |
| 153 | 1  | 1 | 2 | 0 | 1  | 1  | 0 | 4.0 | 15.0 | 0 |
| 153 | 2  | 1 | 1 | 0 | 1  | 4  | 1 | 4.0 | 13.3 | 0 |
| 153 | 3  | 1 | 1 | 0 | 1  | 1  | 0 | 4.0 | 6.8  | 1 |
| 154 | 1  | 1 | 1 | 0 | 0  | 2  | 0 | 3.0 | 4.8  | 1 |
| 154 | 2  | 1 | 1 | 0 | 0  | 1  | 0 | 2.0 | 8.5  | 0 |
| 154 | 3  | 1 | 2 | 0 | 0  | 2  | 0 | 3.0 | 17.5 | 0 |
| 154 | 4  | 1 | 2 | 0 | 0  | 2  | 1 | 1.5 | 6.1  | 0 |
| 154 | 5  | 1 | 1 | 0 | 0  | 2  | 1 | 2.0 | 4.7  | 1 |
| 154 | 6  | 1 | 1 | 0 | 0  | 2  | 1 | 2.0 | 6.1  | 0 |
| 154 | 7  | 1 | 2 | 0 | 0  | 2  | 1 | 4.0 | 9.6  | 0 |

|     |   |   |   |   |    |    |   |     |      |   |
|-----|---|---|---|---|----|----|---|-----|------|---|
| 154 | 8 | 1 | 2 | 0 | 1  | 2  | 0 | 4.0 | 18.1 | 1 |
| 154 | 9 | 1 | 1 | 0 | 1  | 2  | 0 | 4.0 | 6.6  | 1 |
| 155 | 1 | 1 | 2 | 0 | 0  | 2  | 0 | 2.0 | 4.5  | 0 |
| 155 | 2 | 1 | 1 | 0 | 0  | 2  | 0 | 3.0 | 8.5  | 0 |
| 155 | 3 | 1 | 2 | 0 | 0  | 2  | 0 | 3.0 | 18.1 | 0 |
| 155 | 4 | 1 | 2 | 0 | 0  | 3  | 0 | 2.0 | 6.1  | 0 |
| 155 | 5 | 1 | 2 | 0 | 0  | 2  | 0 | 2.5 | 6.1  | 0 |
| 155 | 6 | 1 | 2 | 0 | 0  | 2  | 0 | 4.0 | 15.5 | 0 |
| 155 | 7 | 1 | 1 | 0 | 1  | 2  | 0 | 4.0 | 18.1 | 0 |
| 155 | 8 | 1 | 1 | 0 | 1  | 2  | 0 | 4.0 | 4.4  | 0 |
| 156 | 1 | 1 | 2 | 0 | 0  | 1  | 0 | 2.0 | 6.1  | 1 |
| 156 | 2 | 1 | 2 | 0 | 0  | 2  | 1 | 4.0 | 8.8  | 0 |
| 156 | 3 | 1 | 2 | 0 | 1  | 2  | 0 | 4.0 | 18.1 | 0 |
| 156 | 4 | 1 | 1 | 0 | 1  | 3  | 0 | 4.0 | 13.3 | 0 |
| 157 | 1 | 1 | 1 | 0 | 0  | 2  | 1 | 2.5 | 9.6  | 1 |
| 157 | 2 | 1 | 2 | 0 | 0  | 2  | 0 | 4.0 | 9.6  | 0 |
| 157 | 3 | 1 | 2 | 0 | 0  | 3  | 0 | 4.0 | 8.8  | 0 |
| 157 | 4 | 1 | 2 | 0 | 0  | 1  | 0 | 4.0 | 15.5 | 0 |
| 157 | 5 | 1 | 1 | 0 | 1  | 2  | 0 | 4.0 | 18.1 | 0 |
| 158 | 1 | 1 | 1 | 0 | 1  | 2  | 1 | 4.0 | 18.1 | 1 |
| 158 | 2 | 1 | 1 | 0 | 1  | 2  | 0 | 4.0 | 18.1 | 0 |
| 159 | 1 | 1 | 2 | 0 | 1  | 1  | 1 | 4.0 | 15.0 | 1 |
| 159 | 2 | 1 | 2 | 0 | 1  | 2  | 0 | 3.5 | 4.4  | 1 |
| 160 | 1 | 1 | 2 | 0 | 0  | 2  | 0 | 4.0 | 4.7  | 1 |
| 161 | 1 | 1 | 2 | 0 | 0  | 0  | 0 | 2.0 | 15.5 | 1 |
| 162 | 1 | 1 | 1 | 0 | 1  | 1  | 1 | 4.0 | 15.0 | 0 |
| 163 | 1 | 1 | 2 | 1 | na | na | 0 | 2.0 | na   | 0 |
| 163 | 2 | 1 | 2 | 1 | na | na | 0 | 2.5 | na   | 0 |
| 163 | 3 | 1 | 2 | 1 | na | na | 0 | 3.0 | na   | 0 |
| 164 | 1 | 1 | 2 | 0 | 0  | 1  | 0 | 3.0 | 5.3  | 0 |
| 164 | 2 | 1 | 2 | 0 | 0  | 2  | 1 | 2.0 | 14.2 | 0 |
| 164 | 3 | 1 | 1 | 0 | 0  | 2  | 0 | 1.0 | 6.1  | 0 |
| 165 | 1 | 1 | 0 | 0 | 0  | 1  | 0 | 3.0 | 5.3  | 0 |
| 166 | 1 | 1 | 2 | 0 | 0  | 1  | 1 | 3.0 | 14.2 | 0 |
| 166 | 2 | 1 | 1 | 0 | 0  | 1  | 1 | 3.5 | 18.3 | 0 |
| 167 | 1 | 1 | 1 | 0 | 0  | 1  | 0 | 1.0 | 16.0 | 1 |
| 168 | 1 | 1 | 1 | 0 | 0  | 2  | 0 | 2.0 | 16.0 | 0 |
| 168 | 2 | 1 | 2 | 0 | 0  | 7  | 1 | 1.0 | 6.1  | 0 |
| 168 | 3 | 1 | 2 | 0 | 0  | 2  | 0 | 3.0 | 15.5 | 0 |
| 168 | 4 | 1 | 1 | 0 | 1  | 1  | 0 | 4.0 | 18.1 | 0 |
| 169 | 1 | 1 | 2 | 0 | 0  | 1  | 1 | 2.0 | 18.3 | 0 |
| 169 | 2 | 1 | 1 | 0 | 0  | 1  | 0 | 1.0 | 9.7  | 0 |
| 169 | 3 | 1 | 0 | 0 | 0  | 1  | 1 | 3.0 | 6.1  | 0 |
| 169 | 4 | 1 | 2 | 0 | 0  | 1  | 0 | 3.5 | 15.5 | 0 |
| 169 | 5 | 1 | 1 | 0 | 1  | 2  | 1 | 4.0 | 18.1 | 0 |
| 169 | 6 | 1 | 1 | 0 | 1  | 3  | 0 | 2.5 | 13.3 | 1 |
| 170 | 1 | 1 | 2 | 0 | 0  | 1  | 0 | 3.0 | 1.1  | 0 |



|     |    |   |   |   |    |    |   |     |      |   |
|-----|----|---|---|---|----|----|---|-----|------|---|
| 171 | 1  | 1 | 1 | 0 | 0  | 4  | 1 | 2.5 | 15.5 | 1 |
| 172 | 1  | 1 | 1 | 0 | 1  | 2  | 0 | 4.0 | 18.6 | 0 |
| 172 | 2  | 1 | 1 | 0 | 1  | 1  | 0 | 4.0 | 18.1 | 0 |
| 173 | 1  | 1 | 2 | 1 | na | na | 0 | 3.5 | na   | 0 |
| 173 | 2  | 1 | 2 | 1 | na | na | 0 | 2.5 | na   | 0 |
| 173 | 3  | 1 | 2 | 1 | na | na | 0 | 3.5 | na   | 0 |
| 173 | 4  | 1 | 2 | 0 | 0  | 1  | 0 | 0.5 | 5.3  | 0 |
| 173 | 5  | 1 | 1 | 0 | 0  | 5  | 0 | 0.5 | 16.0 | 0 |
| 173 | 6  | 1 | 2 | 0 | 0  | 1  | 1 | 2.0 | 17.5 | 0 |
| 173 | 7  | 1 | 2 | 0 | 0  | 2  | 0 | 3.0 | 4.7  | 0 |
| 173 | 8  | 1 | 2 | 0 | 0  | 2  | 0 | 3.5 | 9.6  | 0 |
| 173 | 9  | 1 | 1 | 0 | 1  | 6  | 1 | 4.0 | 15.0 | 0 |
| 173 | 10 | 1 | 1 | 0 | 1  | 1  | 0 | 4.0 | 4.4  | 0 |
| 174 | 1  | 1 | 2 | 0 | 1  | 2  | 0 | 4.0 | 19.2 | 1 |
| 174 | 2  | 1 | 2 | 0 | 1  | 1  | 0 | 4.0 | 18.1 | 1 |
| 174 | 3  | 1 | 2 | 0 | 1  | 1  | 0 | 4.0 | 13.3 | 1 |
| 175 | 1  | 1 | 1 | 0 | 1  | 1  | 0 | 3.5 | 13.3 | 1 |
| 175 | 2  | 1 | 0 | 0 | 1  | 2  | 1 | 4.0 | 4.4  | 1 |
| 176 | 1  | 1 | 1 | 0 | 1  | 1  | 0 | 4.0 | 15.0 | 1 |
| 177 | 1  | 1 | 1 | 0 | 1  | 2  | 0 | 4.0 | 13.3 | 0 |
| 177 | 2  | 1 | 1 | 0 | 1  | 1  | 1 | 3.5 | 4.4  | 0 |
| 178 | 1  | 1 | 1 | 0 | 1  | 2  | 0 | 4.0 | 4.4  | 0 |
| 179 | 1  | 1 | 2 | 1 | na | na | 0 | 3.0 | na   | 0 |
| 179 | 2  | 1 | 1 | 0 | 0  | 1  | 1 | 2.0 | 4.5  | 0 |
| 179 | 3  | 1 | 2 | 0 | 0  | 1  | 0 | 2.0 | 14.2 | 0 |
| 179 | 4  | 1 | 1 | 0 | 0  | 5  | 1 | 1.5 | 18.3 | 0 |
| 179 | 5  | 1 | 1 | 0 | 0  | 4  | 1 | 1.0 | 9.7  | 0 |
| 179 | 6  | 1 | 1 | 0 | 0  | 1  | 0 | 1.0 | 1.1  | 0 |
| 179 | 7  | 1 | 1 | 0 | 0  | 1  | 0 | 4.0 | 8.8  | 0 |
| 179 | 8  | 1 | 1 | 0 | 1  | 4  | 1 | 3.0 | 18.6 | 0 |
| 179 | 9  | 1 | 1 | 0 | 1  | 1  | 0 | 4.0 | 13.3 | 0 |
| 180 | 1  | 1 | 2 | 0 | 0  | 0  | 0 | 3.5 | 4.8  | 0 |
| 180 | 2  | 1 | 1 | 0 | 0  | 1  | 0 | 3.0 | 5.3  | 0 |
| 180 | 3  | 1 | 2 | 0 | 0  | 1  | 0 | 0.5 | 16.0 | 0 |
| 180 | 4  | 1 | 0 | 0 | 0  | 4  | 1 | 1.0 | 17.5 | 0 |
| 180 | 5  | 1 | 2 | 0 | 0  | 2  | 0 | 2.5 | 4.7  | 0 |
| 180 | 6  | 1 | 1 | 0 | 0  | 5  | 1 | 3.5 | 9.6  | 0 |
| 180 | 7  | 1 | 1 | 0 | 1  | 2  | 0 | 4.0 | 19.2 | 0 |
| 180 | 8  | 1 | 2 | 0 | 1  | 2  | 0 | 4.0 | 15.0 | 1 |
| 180 | 9  | 1 | 2 | 0 | 1  | 1  | 0 | 4.0 | 13.3 | 1 |
| 181 | 1  | 1 | 2 | 0 | 0  | 0  | 0 | 3.0 | 4.8  | 1 |
| 181 | 2  | 1 | 2 | 0 | 0  | 1  | 1 | 3.0 | 4.5  | 0 |
| 182 | 1  | 1 | 2 | 0 | 0  | 1  | 0 | 2.0 | 4.8  | 0 |
| 182 | 2  | 1 | 1 | 0 | 0  | 1  | 0 | 1.0 | 8.5  | 1 |
| 182 | 3  | 1 | 2 | 0 | 0  | 2  | 0 | 2.5 | 18.3 | 0 |
| 183 | 1  | 1 | 2 | 0 | 0  | 1  | 0 | 1.5 | 4.5  | 0 |
| 183 | 2  | 1 | 0 | 0 | 0  | 1  | 0 | 1.0 | 8.5  | 0 |

---

|     |    |   |   |   |    |    |   |     |      |   |
|-----|----|---|---|---|----|----|---|-----|------|---|
| 183 | 3  | 1 | 1 | 0 | 0  | 1  | 0 | 2.0 | 18.1 | 1 |
| 183 | 4  | 1 | 0 | 0 | 0  | 4  | 1 | 1.0 | 9.7  | 0 |
| 183 | 5  | 1 | 2 | 0 | 0  | 2  | 0 | 2.0 | 4.7  | 1 |
| 183 | 6  | 1 | 2 | 0 | 0  | 4  | 0 | 4.0 | 6.1  | 0 |
| 183 | 7  | 1 | 1 | 0 | 1  | 1  | 0 | 4.0 | 18.6 | 1 |
| 183 | 8  | 1 | 1 | 0 | 1  | 1  | 0 | 4.0 | 15.0 | 1 |
| 183 | 9  | 1 | 1 | 0 | 1  | 2  | 0 | 4.0 | 6.8  | 1 |
| 183 | 10 | 1 | 2 | 0 | 1  | 6  | 1 | 4.0 | 3.3  | 1 |
| 184 | 1  | 1 | 1 | 0 | 0  | 1  | 0 | 2.0 | 4.5  | 0 |
| 185 | 1  | 1 | 2 | 0 | 0  | 1  | 0 | 3.5 | 4.5  | 1 |
| 186 | 1  | 1 | 1 | 0 | 1  | 1  | 0 | 4.0 | 18.1 | 0 |
| 187 | 1  | 1 | 1 | 0 | 1  | 2  | 0 | 4.0 | 15.0 | 0 |
| 187 | 2  | 1 | 1 | 0 | 1  | 2  | 0 | 4.0 | 6.8  | 0 |
| 188 | 1  | 1 | 1 | 0 | 0  | 4  | 0 | 2.0 | 6.1  | 0 |
| 189 | 1  | 1 | 1 | 0 | 1  | 1  | 0 | 2.0 | 18.1 | 0 |
| 190 | 1  | 1 | 2 | 1 | na | na | 0 | 2.0 | na   | 1 |
| 190 | 2  | 1 | 2 | 1 | na | na | 0 | 2.0 | na   | 1 |
| 190 | 3  | 1 | 2 | 1 | na | na | 0 | 2.0 | na   | 1 |
| 190 | 4  | 1 | 2 | 1 | na | na | 0 | 2.0 | na   | 1 |
| 190 | 5  | 1 | 1 | 1 | na | na | 0 | 1.0 | na   | 0 |
| 190 | 6  | 1 | 1 | 1 | na | na | 0 | 1.0 | na   | 0 |
| 190 | 7  | 1 | 2 | 1 | na | na | 0 | 1.0 | na   | 1 |
| 190 | 8  | 1 | 1 | 1 | na | na | 0 | 1.0 | na   | 0 |
| 190 | 9  | 1 | 2 | 1 | na | na | 0 | 1.0 | na   | 1 |
| 190 | 10 | 1 | 1 | 1 | na | na | 0 | 1.0 | na   | 1 |
| 190 | 11 | 1 | 1 | 1 | na | na | 0 | 1.0 | na   | 1 |
| 190 | 12 | 1 | 2 | 1 | na | na | 0 | 1.0 | na   | 0 |
| 190 | 13 | 1 | 1 | 1 | na | na | 0 | 1.0 | na   | 0 |
| 190 | 14 | 1 | 2 | 1 | na | na | 0 | 1.0 | na   | 0 |
| 190 | 15 | 1 | 1 | 1 | na | na | 0 | 1.0 | na   | 0 |
| 190 | 16 | 1 | 2 | 1 | na | na | 0 | 1.0 | na   | 0 |
| 190 | 17 | 1 | 1 | 1 | na | na | 0 | 1.0 | na   | 0 |
| 190 | 18 | 1 | 2 | 1 | na | na | 0 | 3.0 | na   | 0 |
| 190 | 19 | 1 | 2 | 1 | na | na | 0 | 2.5 | na   | 0 |
| 190 | 20 | 1 | 2 | 1 | na | na | 0 | 3.0 | na   | 1 |
| 190 | 21 | 1 | 2 | 1 | na | na | 0 | 4.0 | na   | 1 |
| 190 | 22 | 1 | 2 | 1 | na | na | 0 | 4.0 | na   | 1 |
| 190 | 23 | 1 | 2 | 1 | na | na | 0 | 4.0 | na   | 1 |
| 190 | 24 | 1 | 2 | 1 | na | na | 0 | 4.0 | na   | 1 |
| 190 | 25 | 1 | 2 | 1 | na | na | 0 | 4.0 | na   | 1 |
| 191 | 1  | 1 | 1 | 1 | na | na | 0 | 1.0 | na   | 1 |
| 191 | 2  | 1 | 1 | 1 | na | na | 0 | 1.0 | na   | 0 |
| 191 | 3  | 1 | 1 | 1 | na | na | 0 | 1.0 | na   | 0 |
| 191 | 4  | 1 | 1 | 1 | na | na | 1 | 3.0 | na   | 0 |
| 191 | 5  | 1 | 1 | 1 | na | na | 0 | 3.5 | na   | 0 |
| 191 | 6  | 1 | 2 | 1 | na | na | 0 | 3.5 | na   | 0 |
| 191 | 7  | 1 | 2 | 1 | na | na | 0 | 4.0 | na   | 0 |

|     |    |   |   |   |    |    |   |     |      |   |
|-----|----|---|---|---|----|----|---|-----|------|---|
| 191 | 8  | 1 | 1 | 1 | na | na | 0 | 3.5 | na   | 0 |
| 191 | 9  | 1 | 1 | 1 | na | na | 0 | 3.5 | na   | 1 |
| 191 | 10 | 1 | 1 | 1 | na | na | 0 | 4.0 | na   | 0 |
| 191 | 11 | 1 | 1 | 1 | na | na | 0 | 3.5 | na   | 0 |
| 191 | 12 | 1 | 1 | 1 | na | na | 0 | 2.5 | na   | 1 |
| 191 | 13 | 1 | 2 | 1 | na | na | 1 | 3.0 | na   | 1 |
| 192 | 1  | 1 | 1 | 1 | na | na | 0 | 1.0 | na   | 1 |
| 192 | 2  | 1 | 1 | 1 | na | na | 0 | 2.0 | na   | 1 |
| 192 | 3  | 1 | 1 | 1 | na | na | 0 | 2.0 | na   | 1 |
| 192 | 4  | 1 | 2 | 1 | na | na | 0 | 2.0 | na   | 1 |
| 192 | 5  | 1 | 2 | 1 | na | na | 0 | 2.0 | na   | 1 |
| 193 | 1  | 1 | 2 | 1 | na | na | 0 | 1.0 | na   | 0 |
| 193 | 2  | 1 | 1 | 1 | na | na | 0 | 2.0 | na   | 0 |
| 193 | 3  | 1 | 1 | 1 | na | na | 0 | 2.0 | na   | 0 |
| 193 | 4  | 1 | 1 | 1 | na | na | 0 | 2.0 | na   | 0 |
| 193 | 5  | 1 | 1 | 1 | na | na | 0 | 2.0 | na   | 0 |
| 193 | 6  | 1 | 1 | 1 | na | na | 0 | 2.0 | na   | 0 |
| 193 | 7  | 1 | 1 | 1 | na | na | 0 | 2.0 | na   | 0 |
| 193 | 8  | 1 | 1 | 1 | na | na | 0 | 2.0 | na   | 0 |
| 193 | 9  | 1 | 1 | 1 | na | na | 0 | 4.0 | na   | 0 |
| 193 | 10 | 1 | 2 | 1 | na | na | 0 | 4.0 | na   | 1 |
| 193 | 11 | 1 | 2 | 1 | na | na | 0 | 4.0 | na   | 0 |
| 193 | 12 | 1 | 2 | 1 | na | na | 0 | 4.0 | na   | 1 |
| 193 | 13 | 1 | 2 | 1 | na | na | 0 | 4.0 | na   | 1 |
| 194 | 1  | 1 | 0 | 1 | na | na | 0 | 1.5 | na   | 0 |
| 194 | 2  | 1 | 1 | 1 | na | na | 0 | 3.0 | na   | 0 |
| 194 | 3  | 1 | 1 | 1 | na | na | 0 | 3.0 | na   | 1 |
| 194 | 4  | 1 | 1 | 1 | na | na | 0 | 1.5 | na   | 0 |
| 194 | 5  | 1 | 1 | 1 | na | na | 0 | 1.5 | na   | 1 |
| 194 | 6  | 1 | 1 | 1 | na | na | 0 | 2.0 | na   | 1 |
| 194 | 7  | 1 | 1 | 1 | na | na | 0 | 1.5 | na   | 1 |
| 195 | 1  | 1 | 2 | 0 | 0  | 0  | 0 | 4.0 | 20.0 | 0 |
| 196 | 1  | 1 | 1 | 0 | 0  | 0  | 0 | 4.0 | 20.0 | 1 |
| 196 | 2  | 1 | 1 | 0 | 0  | 0  | 1 | 4.0 | 20.0 | 1 |
| 196 | 3  | 1 | 2 | 0 | 1  | 0  | 0 | 3.5 | 20.0 | 1 |
| 197 | 1  | 1 | 2 | 0 | 0  | 0  | 0 | 4.0 | 20.0 | 1 |
| 197 | 2  | 1 | 1 | 0 | 0  | 0  | 0 | 3.5 | 20.0 | 0 |
| 197 | 3  | 1 | 2 | 0 | 0  | 1  | 0 | 2.0 | 8.8  | 0 |
| 197 | 4  | 1 | 1 | 0 | 1  | 7  | 0 | 4.0 | 18.1 | 0 |
| 197 | 5  | 1 | 1 | 0 | 1  | 0  | 0 | 4.0 | 20.0 | 1 |
| 198 | 1  | 1 | 2 | 0 | 0  | 0  | 0 | 4.0 | 20.0 | 0 |
| 199 | 1  | 1 | 1 | 0 | 0  | 0  | 0 | 3.0 | 20.0 | 0 |
| 199 | 2  | 1 | 2 | 0 | 0  | 0  | 0 | 4.0 | 20.0 | 0 |
| 199 | 3  | 1 | 2 | 0 | 0  | 8  | 0 | 4.0 | 8.8  | 1 |
| 199 | 4  | 1 | 1 | 0 | 0  | 0  | 0 | 4.0 | 20.0 | 1 |
| 200 | 1  | 1 | 2 | 0 | 0  | 0  | 0 | 4.5 | 20.0 | 0 |
| 200 | 2  | 1 | 2 | 0 | 0  | 0  |   |     | 20.0 | 0 |

---

|     |   |   |   |   |   |   |   |     |      |   |
|-----|---|---|---|---|---|---|---|-----|------|---|
| 200 | 3 | 1 | 2 | 0 | 0 | 0 | 0 | 4.0 | 20.0 | 0 |
| 201 | 1 | 1 | 1 | 0 | 0 | 0 | 0 | 3.0 | 20.0 | 0 |
| 201 | 2 | 1 | 2 | 0 | 0 | 0 | 0 | 4.0 | 20.0 | 0 |
| 201 | 3 | 1 | 2 | 0 | 0 | 0 | 0 | 3.0 | 20.0 | 1 |
| 202 | 1 | 1 | 1 | 0 | 0 | 0 | 0 | 3.0 | 20.0 | 0 |
| 202 | 2 | 1 | 1 | 0 | 0 | 0 | 0 | 3.0 | 20.0 | 0 |
| 203 | 1 | 1 | 2 | 0 | 0 | 9 | 0 | 4.0 | 20.0 | 0 |
| 203 | 2 | 1 | 1 | 0 | 0 | 3 | 0 | 3.0 | 20.0 | 0 |
| 203 | 3 | 1 | 2 | 0 | 0 | 7 | 1 | 3.0 | 9.6  | 0 |
| 203 | 4 | 1 | 2 | 0 | 1 | 5 | 1 | 4.0 | 18.6 | 0 |
| 203 | 5 | 1 | 2 | 0 | 1 | 1 | 0 | 4.0 | 6.6  | 1 |
| 204 | 1 | 1 | 2 | 0 | 0 | 0 | 0 | 4.0 | 20.0 | 0 |
| 204 | 2 | 1 | 1 | 0 | 1 | 0 | 0 | 4.0 | 20.0 | 0 |
| 205 | 1 | 1 | 2 | 0 | 0 | 1 | 0 | 3.0 | 4.7  | 0 |
| 205 | 2 | 1 | 2 | 0 | 0 | 1 | 0 | 3.5 | 9.6  | 0 |
| 205 | 3 | 1 | 2 | 0 | 1 | 0 | 0 | 4.0 | 18.6 | 0 |
| 206 | 1 | 1 | 2 | 0 | 0 | 0 | 0 | 3.0 | 4.7  | 0 |
| 206 | 2 | 1 | 2 | 0 | 0 | 1 | 0 | 3.5 | 9.6  | 0 |
| 207 | 1 | 1 | 2 | 0 | 0 | 1 | 1 | 3.0 | 6.1  | 0 |
| 207 | 2 | 1 | 1 | 0 | 0 | 0 | 1 | 2.0 | 15.5 | 0 |
| 208 | 1 | 1 | 1 | 0 | 0 | 2 | 0 |     | 14.2 | 0 |
| 208 | 2 | 1 | 2 | 0 | 0 | 1 | 1 | 3.0 | 17.5 | 1 |
| 209 | 1 | 1 | 2 | 0 | 0 | 0 | 0 | 4.0 | 14.2 | 0 |
| 209 | 2 | 1 | 2 | 0 | 0 | 1 | 0 | 2.5 | 9.7  | 0 |
| 209 | 3 | 1 | 2 | 0 | 0 | 1 | 0 | 2.0 | 1.1  | 0 |
| 209 | 4 | 1 | 2 | 0 | 0 | 1 | 0 | 3.5 | 15.5 | 0 |
| 209 | 5 | 1 | 1 | 0 | 1 | 9 | 0 | 4.0 | 18.1 | 0 |
| 209 | 6 | 1 | 0 | 0 | 1 | 1 | 0 | 3.5 | 13.3 | 0 |
| 210 | 1 | 1 | 2 | 0 | 0 | 1 | 1 | 1.5 | 6.1  | 0 |
| 211 | 1 | 1 | 2 | 0 | 0 | 1 | 0 | 3.5 | 18.3 | 1 |
| 212 | 1 | 1 | 1 | 0 | 0 | 0 | 0 | 3.5 | 18.3 | 0 |
| 212 | 2 | 1 | 2 | 0 | 0 | 0 | 0 | 4.0 | 9.7  | 0 |
| 212 | 3 | 1 | 1 | 0 | 0 | 0 | 0 | 3.0 | 1.1  | 0 |
| 212 | 4 | 1 | 2 | 0 | 0 |   | 1 | 3.5 | 8.8  | 0 |
| 212 | 5 | 1 | 2 | 0 | 1 | 3 | 0 | 2.0 | 18.1 | 0 |
| 213 | 1 | 1 | 2 | 0 | 0 | 0 | 0 | 4.0 | 17.5 | 0 |
| 213 | 2 | 1 | 0 | 0 | 0 | 0 | 0 | 4.0 | 1.1  | 0 |
| 213 | 3 | 1 | 1 | 0 | 0 | 1 | 0 | 2.0 | 8.8  | 0 |
| 213 | 4 | 1 | 1 | 0 | 0 | 3 | 1 | 2.5 | 15.0 | 0 |
| 214 | 1 | 1 | 0 | 0 | 0 | 5 | 1 | 2.0 | 1.1  | 0 |
| 215 | 1 | 1 | 1 | 0 | 0 | 3 | 0 | 2.0 | 1.1  | 0 |
| 215 | 2 | 1 | 2 | 0 | 0 | 1 | 0 | 4.5 | 8.8  | 0 |
| 216 | 1 | 1 | 1 | 0 | 0 | 2 | 0 | 1.0 | 8.5  | 0 |
| 216 | 2 | 1 | 0 | 0 | 0 | 2 | 0 | 1.0 | 18.3 | 0 |
| 216 | 3 | 1 | 2 | 0 | 0 | 1 | 0 | 3.0 | 9.7  | 0 |
| 216 | 4 | 1 | 1 | 0 | 0 | 1 | 0 | 2.5 | 1.1  | 0 |
| 216 | 5 | 1 | 2 | 0 | 0 | 1 | 1 | 4.0 | 15.5 | 0 |

|     |   |   |   |   |   |    |   |     |      |   |
|-----|---|---|---|---|---|----|---|-----|------|---|
| 216 | 6 | 1 | 1 | 0 | 1 | 1  | 0 | 4.0 | 18.1 | 0 |
| 216 | 7 | 1 | 1 | 0 | 1 | 1  | 0 | 4.0 | 6.6  | 0 |
| 217 | 1 | 1 | 1 | 0 | 0 | 1  | 1 |     | 14.2 | 0 |
| 217 | 2 | 1 | 2 | 0 | 0 | 0  | 1 | 3.5 | 18.3 | 0 |
| 217 | 3 | 1 | 1 | 0 | 0 | 1  | 1 | 1.0 | 9.7  | 0 |
| 217 | 4 | 1 | 1 | 0 | 0 | 1  | 0 | 2.0 | 1.1  | 0 |
| 217 | 5 | 1 | 1 | 0 | 0 | 1  | 0 | 4.0 | 8.8  | 0 |
| 217 | 6 | 1 | 2 | 0 | 1 | 1  | 1 | 3.0 | 18.6 | 1 |
| 218 | 1 | 1 | 1 | 0 | 0 | 1  | 0 | 2.0 | 9.7  | 1 |
| 219 | 1 | 1 | 2 | 0 | 0 | 1  | 0 | 2.5 | 16.0 | 0 |
| 219 | 2 | 1 | 1 | 0 | 0 | 1  | 0 | 3.0 | 18.1 | 0 |
| 220 | 1 | 1 | 0 | 0 | 0 | 2  | 0 | 2.0 | 5.3  | 0 |
| 220 | 2 | 1 | 1 | 0 | 0 | 1  | 0 |     | 14.2 | 0 |
| 220 | 3 | 1 | 1 | 0 | 0 | 4  | 0 | 1.0 | 16.0 | 1 |
| 220 | 4 | 1 | 0 | 0 | 0 | 5  | 0 | 1.5 | 17.5 | 0 |
| 220 | 5 | 1 | 2 | 0 | 0 | 2  | 0 | 2.0 | 9.6  | 0 |
| 220 | 6 | 1 | 2 | 0 | 1 | 4  | 0 | 2.0 | 19.2 | 0 |
| 221 | 1 | 1 | 1 | 0 | 0 | 3  | 0 | 1.0 | 16.0 | 1 |
| 221 | 2 | 1 | 0 | 0 | 0 | 2  | 0 | 1.0 | 18.1 | 0 |
| 221 | 3 | 1 | 0 | 0 | 0 | 2  | 0 | 1.0 | 9.7  | 0 |
| 221 | 4 | 1 | 0 | 0 | 0 | 3  | 1 | 1.0 | 1.1  | 0 |
| 221 | 5 | 1 | 0 | 0 | 0 | 2  | 0 | 0.5 | 8.8  | 0 |
| 222 | 1 | 1 | 2 | 0 | 0 | 7  | 1 | 0.5 | 14.2 | 0 |
| 222 | 2 | 1 | 1 | 0 | 0 | 4  | 0 | 1.0 | 18.3 | 0 |
| 222 | 3 | 1 | 0 | 0 | 0 | 4  | 1 | 0.5 | 17.5 | 0 |
| 222 | 4 | 1 | 1 | 0 | 0 | 3  | 1 | 1.0 | 6.1  | 0 |
| 222 | 5 | 1 | 0 | 0 | 0 | 2  | 0 | 1.0 | 1.1  | 0 |
| 222 | 6 | 1 | 0 | 0 | 0 | 2  | 1 | 0.5 | 9.6  | 0 |
| 222 | 7 | 1 | 2 | 0 | 1 | 6  | 1 | 2.0 | 18.6 | 0 |
| 223 | 1 | 1 | 1 | 0 | 0 | 1  | 0 | 2.0 | 14.2 | 1 |
| 224 | 1 | 1 | 2 | 0 | 1 | 0  | 0 | 4.0 | 13.3 | 0 |
| 225 | 1 | 1 | 1 | 0 | 1 | 0  | 0 | 2.5 | 13.3 | 1 |
| 226 | 1 | 1 | 2 | 0 | 0 | 4  | 0 | 1.5 | 8.5  | 0 |
| 226 | 2 | 1 | 2 | 0 | 0 | 4  | 0 | 4.0 | 17.5 | 0 |
| 226 | 3 | 1 | 2 | 0 | 0 | 1  | 0 | 3.0 | 8.8  | 0 |
| 227 | 1 | 1 | 1 | 0 | 0 | 2  | 0 | 2.5 | 16.0 | 0 |
| 228 | 1 | 1 | 2 | 0 | 0 | 3  | 1 | 2.0 | 18.3 | 0 |
| 229 | 1 | 1 | 2 | 0 | 0 | 3  | 1 | 1.5 | 17.5 | 0 |
| 230 | 1 | 1 | 2 | 0 | 0 | 11 | 0 | 3.0 | 9.7  | 0 |
| 231 | 1 | 1 | 2 | 0 | 0 | 1  | 0 | 3.0 | 17.5 | 1 |
| 232 | 1 | 1 | 2 | 0 | 0 | 0  | 0 | 4.0 | 9.6  | 1 |
| 233 | 1 | 1 | 2 | 0 | 0 | 4  | 1 | 3.5 | 1.1  | 1 |
| 234 | 1 | 1 | 2 | 0 | 1 |    | 0 | 4.0 | 18.1 | 0 |

Average Temp: average temperature per month; CP: centrifugation protocol, 0 = one-step, low speed, 1 = two-step, high speed; EGFR mut ctDNA: EGFR mutated ctDNA, 0 = not detected, 1 = detected; EGFR status: EGFR mutational status as determined by tissue and/or liquid biopsy, 0 = EGFR WT, 1 = EGFR mutated; Hemolysis: 0 = no visible hemolysis 1 = visible hemolysis present; Na: not applicable; Sens: reached assay sensitivity (maximal detectable EGFR mutation frequency), 0 >3%, 1 = 0.5 – 3%, 2 <0.5%; Transit Time:

number of days between sample collection and processing; Tube: 0 = Streck tube, 1 = EDTA tube; # mL:  
volume of generated plasma.
